# Supplementary material for: “You feel like you have a neon light over your head ”: A Qualitative Study Examining the Experiences and Perspectives of Family Members regarding the Stigma of those Diagnosed with Lung Cancer
Source: Research Square preprint supplement (doi:10.21203/rs.3.rs-7480697/v1), 2025-10-10
Supplement: Supplementary file 1 [file 80804ad554cb37203f88fa50.docx]

***Interview Schedule***

**Background:**

Age

Gender

Can you tell me which member of your family has been diagnosed with lung cancer?

Can you tell me how long ago they were diagnosed?

Can you tell me about your family members smoking history?

Can you tell me about your smoking history?

**Family members stigma experiences:**

Has your family member ever experienced stigmatising behaviours/discrimination/blaming attitudes from others because of their diagnosis? This can include different groups such as health professionals, friends, acquaintances, community, family.

If so, can you tell me about a time(s) when this happened?

Can you describe how this impacted them?

**Participants’ stigma experiences:**

Haveyou ever experienced stigma from others because of your family members diagnosis?

If so, can you tell me about a time(s) when this happened?

Can you describe how this impacted you?

Have you encountered any stigmatising behaviours that come from within the family?

If so, can you tell me about them?

**Participants feelings towards diagnosis:**

Can you tell me your opinion about the causes of lung cancer in general?

Can you describe how your family members diagnosis affected you?

Can you describe how your family members diagnosis made you feel at the time?

Can you describe how your family members diagnosis makes you feel now?

How has the diagnosis impacted other members of your family?

**Relationship:**

Can you describe your relationship with your family member before their diagnosis?

Can you describe your relationship with your family member after their diagnosis?

Can you describe what your relationship is like now?

How did their diagnosis affect their relationship with other family members?

**Smoking:**

Have others ever asked about or brought up smoking to you or your family member? This can include experiences with health professionals, friends, acquaintances, community.

What impact did this have on you and your family member?

Have other family members ever brought up smoking to you or your family member?

What impact did this have within the family?

**Ending:**

Is there anything else you would like me to know about?
